# Supplementary material for: Comparing Multimodal Methods to Study Women's Safety and Mobility in Informal Urban Neighborhoods: A Systematic Review for SDG 11 Implementation
Source: Research Square preprint supplement (doi:10.21203/rs.3.rs-7661173/v1), 2025-11-04
Supplement: Supplementary file 1 [file 70cf186ed80ebd791e70b10d.pdf]

## A.1 Component Metrics

### Coverage Complementarity Index (CCI):

$$CCI = \frac{|\{c_i : c_i \in C_{methods}\}|}{|C_{total}|} \quad (1)$$

where  $C_{methods}$  represents the set of unique coverage types in the method combination, and  $C_{total} = 8$  represents the theoretical maximum coverage types in urban safety research (extensive, intensive, observational, narrative, prospective, collective, sensor, aerial).

### Triangulation Validity Coefficient (TVC):

$$TVC = \max \left( 0, 1 - \frac{CV_{norm}}{0.5} \right) \quad (2)$$

where the coefficient of variation is defined as:

$$CV_{norm} = \frac{\sigma_{explanatory}}{\mu_{explanatory}} \quad (3)$$

and  $\sigma_{explanatory}$  and  $\mu_{explanatory}$  are the standard deviation and mean of explanatory power values across methods in the combination (45; 46).

### Resource Efficiency Ratio (RER):

$$RER = \frac{\sum_{i=1}^n E_i}{\sum_{i=1}^n R_i} \quad (4)$$

where  $E_i$  represents the explanatory power and  $R_i$  the resource requirement for method  $i$  in an  $n$ -method combination (43).

### Sample Adequacy Index (SAI):

$$SAI = \min \left( 1.0, \frac{\log_{10}(S_{weighted} + 1)}{3} \right) \quad (5)$$

where the weighted sample size is calculated as:

$$S_{weighted} = \frac{\sum_{i=1}^n S_i \cdot E_i}{\sum_{i=1}^n E_i} \quad (6)$$

and  $S_i$  represents the sample size for method  $i$  (47).

### Convergent Validity Score (CVS):

$$CVS = \max \left( 0, \min \left( 1, 0.5 + \sum_j \beta_j \cdot I_j - \sum_k \gamma_k \cdot D_k \right) \right) \quad (7)$$

where  $I_j$  are binary indicators for documented convergent method pairs with coefficients  $\beta_j$ , and  $D_k$  are binary indicators for documented divergent combinations with penalties  $\gamma_k$ , based on empirical findings from the Lomas del Centinela study.

## A.2 Composite Integration Index

The Methodological Integration Index is calculated as a weighted linear combination:

$$MII = w_1 \cdot CCI + w_2 \cdot TVC + w_3 \cdot RER_{norm} + w_4 \cdot SAI + w_5 \cdot CVS \quad (8)$$

where weights are based on mixed methods literature (42):

$$w_1 = 0.25 \quad (\text{Coverage complementarity}) \quad (9)$$

$$w_2 = 0.20 \quad (\text{Triangulation validity}) \quad (10)$$

$$w_3 = 0.20 \quad (\text{Resource efficiency}) \quad (11)$$

$$w_4 = 0.15 \quad (\text{Sample adequacy}) \quad (12)$$

$$w_5 = 0.20 \quad (\text{Convergent validity}) \quad (13)$$

and  $RER_{norm}$  is the normalized resource efficiency ratio:

$$RER_{norm} = \min \left( 1.0, \frac{RER}{RER_{max}} \right) \quad (14)$$

with  $RER_{max} = 3.0$  representing the theoretical maximum efficiency based on the method performance data.

### A.3 Empirical Calibration Parameters

The convergent validity coefficients are calibrated based on documented research findings:

$$\beta_{video+walks} = 0.15 \quad (89\% \text{ human vs } 25\% \text{ algorithmic accuracy}) \quad (15)$$

$$\beta_{mapping+survey} = 0.10 \quad (\text{Collective knowledge convergence}) \quad (16)$$

$$\gamma_{gps+mapping} = 0.20 \quad (50.9\% \text{ coverage gap divergence}) \quad (17)$$

$$\gamma_{drone+isolation} = 0.15 \quad (\text{Aerial-ground truth divergence}) \quad (18)$$

The MII provides a standardized metric (range: 0-1) for comparing methodological integration effectiveness, with higher values indicating superior complementarity, validity, efficiency, and empirical convergence (48).

### A.4 Component Metrics

#### Coverage Complementarity Index (CCI):

$$CCI = \frac{|\{c_i : c_i \in C_{methods}\}|}{|C_{total}|} \quad (19)$$

where  $C_{methods}$  represents the set of unique coverage types in the method combination, and  $C_{total} = 8$  represents the theoretical maximum coverage types in urban safety research (extensive, intensive, observational, narrative, prospective, collective, sensor, aerial).

#### Triangulation Validity Coefficient (TVC):

$$TVC = \max \left( 0, 1 - \frac{CV_{norm}}{0.5} \right) \quad (20)$$

where the coefficient of variation is defined as:

$$CV_{norm} = \frac{\sigma_{explanatory}}{\mu_{explanatory}} \quad (21)$$

and  $\sigma_{explanatory}$  and  $\mu_{explanatory}$  are the standard deviation and mean of explanatory power values across methods in the combination (45; 46).

#### Resource Efficiency Ratio (RER):

$$RER = \frac{\sum_{i=1}^n E_i}{\sum_{i=1}^n R_i} \quad (22)$$

where  $E_i$  represents the explanatory power and  $R_i$  the resource requirement for method  $i$  in an  $n$ -method combination (43).

#### Sample Adequacy Index (SAI):

$$SAI = \min \left( 1.0, \frac{\log_{10}(S_{weighted} + 1)}{3} \right) \quad (23)$$

where the weighted sample size is calculated as:

$$S_{weighted} = \frac{\sum_{i=1}^n S_i \cdot E_i}{\sum_{i=1}^n E_i} \quad (24)$$

and  $S_i$  represents the sample size for method  $i$  (47).

#### Convergent Validity Score (CVS):

$$CVS = \max \left( 0, \min \left( 1, 0.5 + \sum_j \beta_j \cdot I_j - \sum_k \gamma_k \cdot D_k \right) \right) \quad (25)$$

where  $I_j$  are binary indicators for documented convergent method pairs with coefficients  $\beta_j$ , and  $D_k$  are binary indicators for documented divergent combinations with penalties  $\gamma_k$ , based on empirical findings from the Lomas del Centinela study.

## A.5 Composite Integration Index

The Methodological Integration Index is calculated as a weighted linear combination:

$$MII = w_1 \cdot CCI + w_2 \cdot TVC + w_3 \cdot RER_{norm} + w_4 \cdot SAI + w_5 \cdot CVS \quad (26)$$

where weights are based on mixed methods literature (42):

$$w_1 = 0.25 \quad (\text{Coverage complementarity}) \quad (27)$$

$$w_2 = 0.20 \quad (\text{Triangulation validity}) \quad (28)$$

$$w_3 = 0.20 \quad (\text{Resource efficiency}) \quad (29)$$

$$w_4 = 0.15 \quad (\text{Sample adequacy}) \quad (30)$$

$$w_5 = 0.20 \quad (\text{Convergent validity}) \quad (31)$$

and  $RER_{norm}$  is the normalized resource efficiency ratio:

$$RER_{norm} = \min \left( 1.0, \frac{RER}{RER_{max}} \right) \quad (32)$$

with  $RER_{max} = 3.0$  representing the theoretical maximum efficiency based on the method performance data.

## A.6 Empirical Calibration Parameters

The convergent validity coefficients are calibrated based on documented research findings:

$$\beta_{video+walks} = 0.15 \quad (89\% \text{ human vs } 25\% \text{ algorithmic accuracy}) \quad (33)$$

$$\beta_{mapping+survey} = 0.10 \quad (\text{Collective knowledge convergence}) \quad (34)$$

$$\gamma_{gps+mapping} = 0.20 \quad (50.9\% \text{ coverage gap divergence}) \quad (35)$$

$$\gamma_{drone+isolation} = 0.15 \quad (\text{Aerial-ground truth divergence}) \quad (36)$$

The MII provides a standardized metric (range: 0-1) for comparing methodological integration effectiveness, with higher values indicating superior complementarity, validity, efficiency, and empirical convergence (48).

## B Method Performance Assessment Framework

**Table 1.** Method Performance Scoring Rationale

| Method                                 | Resources (0-1) | Explanatory Power (0-1) | Justification                                                                                                                |
|----------------------------------------|-----------------|-------------------------|------------------------------------------------------------------------------------------------------------------------------|
| <b>Resource Requirements Rationale</b> |                 |                         |                                                                                                                              |
| Community Survey                       | 0.25            | 0.55                    | Very scalable, distributed during food events, minimal coordination required                                                 |
| Safety Paths App                       | 0.30            | 0.40                    | Low initial development time, but adoption and internet connectivity issues reduced effectiveness                            |
| Safety Walk-alongs                     | 0.45            | 0.90                    | More efficient in group format, moderate coordination, provided unique real-time insights                                    |
| Children Future Visioning              | 0.50            | 0.80                    | Moderate coordination needed for creative sessions, generated implementable local solutions                                  |
| Video Analysis                         | 0.60            | 0.89                    | Moderate resources: systematic documentation plus computational analysis, achieved 89% accuracy vs 25% algorithmic detection |
| Collective Mapping                     | 0.65            | 0.60                    | High coordination complexity, but missed 50.9% of real-time fear events                                                      |
| Audiovisual Interviews                 | 0.70            | 0.75                    | One-on-one intensive approach: 8 interviews = 8 hours, deep personal narratives                                              |
| Agent-Based Modeling                   | 0.80            | 0.50                    | High technical expertise required, predicted 30% reduction in route avoidance scenarios                                      |
| GPS Sensors & Wearables                | 0.85            | 0.25                    | Days of development time plus technical complexity, but only detected 25% of fear events                                     |
| Drone Observation                      | 0.90            | 0.35                    | Very high cost: equipment, piloting expertise, regulations, limited to accessing "blank zones"                               |

Top 3 Most Efficient Methods: 1. Community Survey: 2.20 insight per resource unit 2. Safety Walk-alongs: 2.00 insight per resource unit 3. Children Future Visioning: 1.60 insight per resource unit

**Table 2.** Scoring Methodology and Key Research Findings

| Scoring Component                      | Criteria and Evidence                                                                    |
|----------------------------------------|------------------------------------------------------------------------------------------|
| <b>Resource Requirements Weighting</b> |                                                                                          |
| Time Investment (40%)                  | Based on reported hours: "8 entrevistas = 8 horas", "días de desarrollo" for GPS sensors |
| Coordination Complexity (30%)          | Implementation challenges: "talleres por coordinación", group vs individual methods      |
| Technical Expertise (20%)              | Development requirements: app programming, sensor development, ABM simulation            |
| Equipment Costs (10%)                  | Hardware needs: GPS devices, drones, cameras vs. paper-based methods                     |
| <b>Explanatory Power Weighting</b>     |                                                                                          |
| Detection Accuracy (30%)               | Quantitative findings: 25% GPS detection, 89% video analysis accuracy                    |
| Unique Insights (25%)                  | Methods providing "insights únicos que no obtuviste de otros"                            |
| Community Utility (25%)                | Generated "ideas implementables locales", validated qualitative findings                 |
| Policy Relevance (20%)                 | Intervention potential: 30% route avoidance reduction, spatial correlation analysis      |
| <b>Key Research Calibration Points</b> |                                                                                          |
| Fear Detection Gap                     | 50.9% of fear signals occurred outside collectively mapped danger zones                  |
| Algorithm vs Human                     | Computer vision: 25% accuracy; Human interpretation: 89% accuracy                        |
| Spatial Disconnection                  | Only 16.9% overlap between fear activations and official crime data                      |
| Intervention Potential                 | Agent-based modeling predicted 30% reduction in female route avoidance                   |
| Environmental Correlation              | Design features ( $r=0.73$ ) vs crime density ( $r=0.34$ ) for danger perception         |
